# Supplementary material
Source: Springer Nature journal article supplement (https://www.springermedizin.de/resource/supplementary/12958_2009_543_MOESM1_ESM.pdf/9568268)

Na<sub>v</sub> 1.1 1.2 1.3 1.4 1.5 1.6 1.7 1.8 1.9 Na<sub>x</sub>

β<sub>1</sub> β<sub>2</sub> β<sub>3</sub> β<sub>4</sub>

TESTIS

SPERM

(-) CONTROL

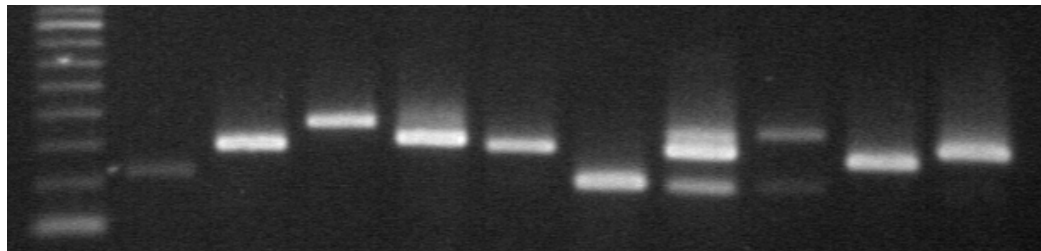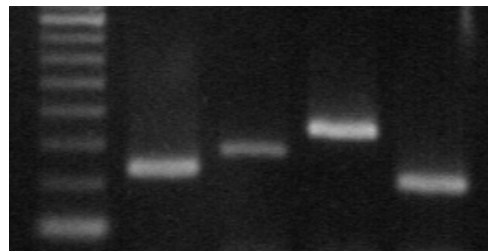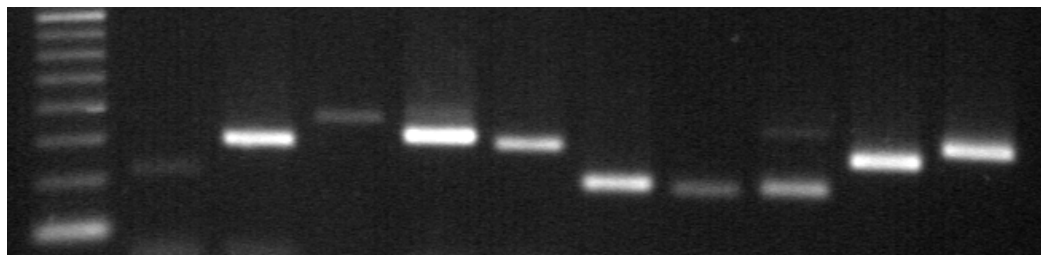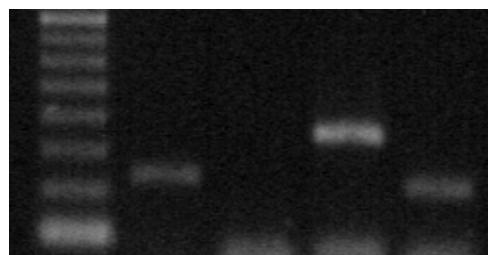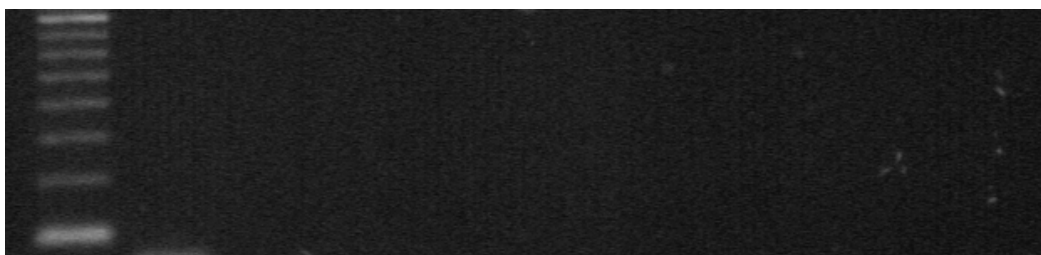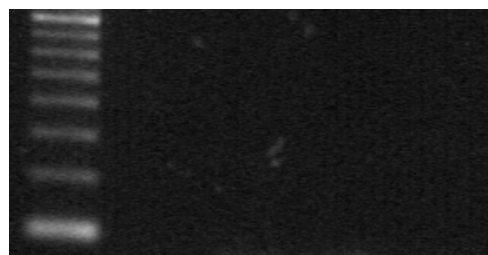

Supplement: MOESM1 [file 9568268]
